# Supplementary material for: Estimating ground-level PM 2.5 in eastern China using aerosol optical depth determined from the GOCI satellite instrument
Source: Copernicus journal article supplement (doi:10.5194/acp-15-13133-2015), 2015-11-27
Supplement: Supplementary file 2 [file acp-15-13133-2015-supplement.pdf]

Supplement of Atmos. Chem. Phys., 15, 13133–13144, 2015  
<http://www.atmos-chem-phys.net/15/13133/2015/>  
doi:10.5194/acp-15-13133-2015-supplement  
© Author(s) 2015. CC Attribution 3.0 License.

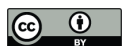

*Supplement of*

## **Estimating ground-level PM<sub>2.5</sub> in eastern China using aerosol optical depth determined from the GOCI satellite instrument**

**J.-W. Xu et al.**

*Correspondence to:* J.-W. Xu (junwei.xu@dal.ca)

The copyright of individual parts of the supplement might differ from the CC-BY 3.0 licence.

## Supplements

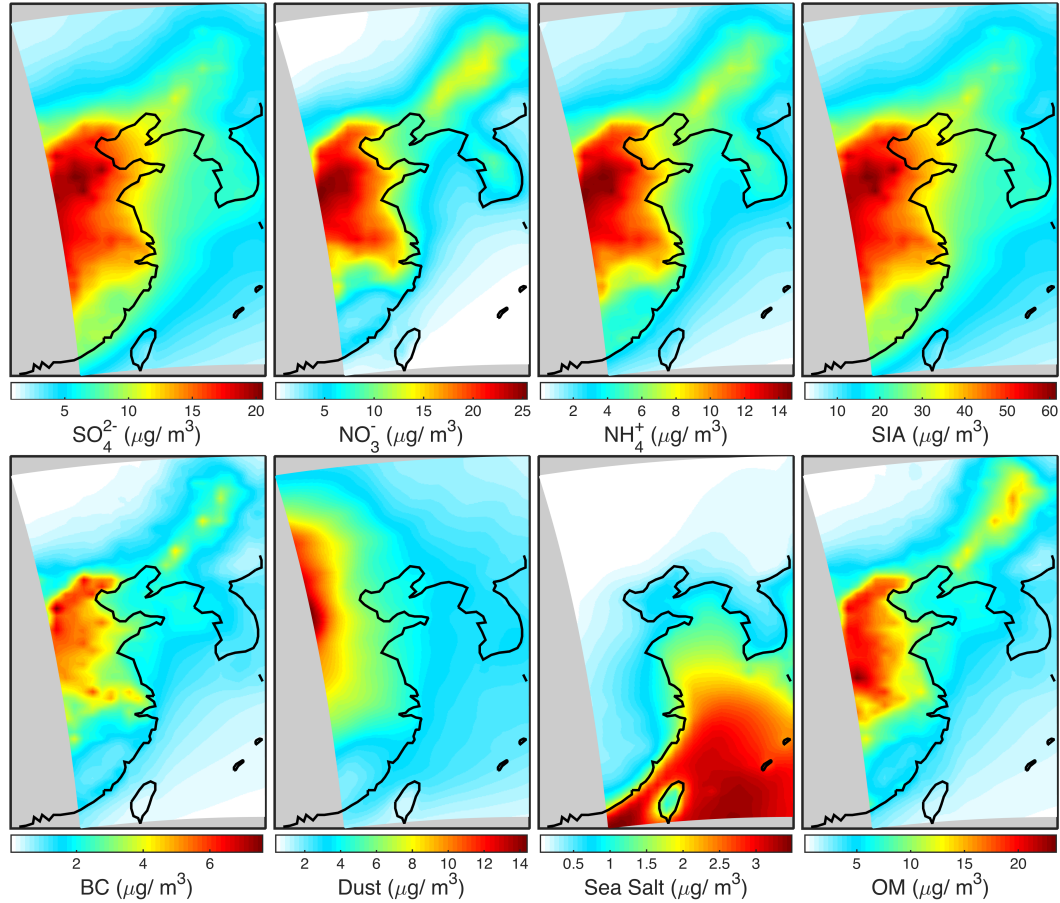

- 1 **Figure S1.** Spatial distribution of GOCI-derived PM<sub>2.5</sub> composition for 2013.
- 2 Abbreviations are Secondary Inorganic Aerosol (SIA; the sum of SO<sub>4</sub><sup>2-</sup>, NO<sub>3</sub><sup>-</sup>, and NH<sub>4</sub><sup>+</sup>),
- 3 Organic Mass (OM), and Black Carbon (BC). Gray denotes missing values.

- 4 Figure S1 shows the spatial distribution of GOCI-derived PM<sub>2.5</sub> composition for 2013.
- 5 Enhancements of most components are apparent in the North China Plain. Secondary
- 6 inorganic aerosol concentrations over vast regions in eastern China exceed 40 μg m<sup>-3</sup>.
- 7 Sulfate and nitrate contribute similarly to SIA. Northern China has enhanced OM
- 8 concentrations. Mineral dust is more pronounced toward the west and closer to the Gobi
- 9 desert.
